# Supplementary material
Source: PubMed Central journal article supplement (PMC4535267)
Supplement: rsta20140279supp1.pdf [file rsta20140279supp1.pdf]

# Electronic supplementary material for the paper “A Stefan problem on an evolving surface”

Amal Alphonse and Charles M. Elliott

(ESM1) *Proof that  $L_X^p$  is a normed space (slight modification of the proof of Theorem 2.8 in [1]).* It is easy to verify that the expressions in (2.2) define norms if the integrals on the right hand sides are well-defined, which we now check. So let  $u \in L_X^p$ . Then  $\tilde{u} := \phi_{-(\cdot)}u(\cdot) \in L^p(0, T; X_0)$ . Define  $F: [0, T] \times X_0 \rightarrow \mathbb{R}$  by  $F(t, x) = \|\phi_t x\|_{X(t)}$ . By assumption,  $t \mapsto F(t, x)$  is measurable for all  $x \in X_0$ , and if  $x_n \rightarrow x$  in  $X_0$ , then by the reverse triangle inequality,

$$|F(t, x_n) - F(t, x)| \leq \|\phi_t(x_n - x)\|_{X(t)} \leq C_X \|x_n - x\|_{X_0} \rightarrow 0,$$

so  $x \mapsto F(t, x)$  is continuous. Thus  $F$  is a Carathéodory function. Due to the condition  $|F(t, x)| \leq C_X \|x\|_{X_0}$ , by Remark 3.4.5 of [2], the Nemytskii operator  $N_F$  defined by  $(N_F x)(t) := F(t, x(t))$  maps  $L^p(0, T; X_0) \rightarrow L^p(0, T)$ , so that

$$\|N_F \tilde{u}\|_{L^p(0, T)}^p = \int_0^T \|u(t)\|_{X(t)}^p < \infty.$$

□

(ESM2) *Proof of Lemma 2.3.* First we show that if  $u \in L^p(0, T; X_0)$ , then  $\phi_{(\cdot)}u(\cdot) \in L_X^p$ .

Let  $u \in L^p(0, T; X_0)$  be arbitrary. By density, there exists a sequence of simple functions  $u_n \in L^p(0, T; X_0)$  with

$$\|u_n - u\|_{L^p(0, T; X_0)} \rightarrow 0$$

and thus for almost every  $t$ ,

$$\|u_n(t) - u(t)\|_{X_0} \rightarrow 0$$

for a subsequence, which we relabelled. We have that  $\phi_t u_n(t) \rightarrow \phi_t u(t)$  in  $X(t)$  by continuity; this implies

$$\|\phi_t u_n(t)\|_{X(t)} \rightarrow \|\phi_t u(t)\|_{X(t)} \quad \text{pointwise a.e.} \quad (1)$$

Write  $u_n(t) = \sum_{i=1}^{M_n} u_{n,i} \mathbf{1}_{B_i}(t)$  where the  $u_{n,i} \in X_0$  and the  $B_i$  are measurable, disjoint and partition  $[0, T]$ . Then

$$\phi_t u_n(t) = \sum_{i=1}^{M_n} \phi_t(u_{n,i}) \mathbf{1}_{B_i}(t) \in X(t).$$

Taking norms and exponentiating, we get

$$\|\phi_t u_n(t)\|_{X(t)}^p = \sum_{i=1}^{M_n} \|\phi_t u_{n,i}\|_{X(t)}^p \mathbf{1}_{B_i}^p(t),$$

which is measurable (with respect to  $t$ ) since, by assumption, the  $\|\phi_t u_{n,i}\|_{X(t)}$  are measurable and a finite sum of measurable functions is measurable. Thus, by (1),  $\|\phi_t u(t)\|_{X(t)}$ , is measurable. Finally,

$$\int_0^T \|\phi_t u(t)\|_{X(t)}^p \leq \int_0^T C_X^p \|u(t)\|_{X_0}^p = C_X^p \|u\|_{L^p(0, T; X_0)}^p,$$

so  $\phi_{(\cdot)}u(\cdot) \in L_X^p$ .

So there is a map from  $L^p(0, T; X_0)$  to  $L_X^p$  and vice-versa from the definition of  $L_X^p$ . The isomorphism between the spaces is  $T: L^p(0, T; X_0) \rightarrow L_X^p$  where

$$Tu = \phi_{(\cdot)}u(\cdot), \quad \text{and} \quad T^{-1}v = \phi_{-(\cdot)}v(\cdot).$$

It is easy to check that  $T$  is linear and bijective. The equivalence of norms follows by the bounds on  $\phi_{-t}: X(t) \rightarrow X_0$

$$\frac{1}{C_X} \|u(t)\|_{X(t)} \leq \|\phi_{-t}u(t)\|_{X_0} \leq C_X \|u(t)\|_{X(t)}.$$

□

(ESM3) (*Slight modification of the proof of Lemma 2.13 in [1]*) By consideration of the Caratheodory map  $F: [0, T] \times X_0^* \times X_0 \rightarrow \mathbb{R}$  defined by

$$F(t, x^*, x) = \langle \phi_{-t}^* x^*, \phi_t x \rangle_{X^*(t), X(t)}$$

and using Remark 3.4.2 of [2], given  $g \in L_{X^*}^p$  and  $f \in L_{X^*}^q$ , we have with  $\tilde{g} := \phi_{(\cdot)}^* g(\cdot)$  and  $\tilde{f} := \phi_{(\cdot)} f(\cdot)$  that  $t \mapsto \langle \phi_{-t}^* \tilde{g}(t), \phi_t \tilde{f}(t) \rangle_{X^*(t), X(t)} = \langle g(t), f(t) \rangle_{X^*(t), X(t)}$  is measurable, since  $t \mapsto \tilde{g}(t)$  and  $t \mapsto \tilde{f}(t)$  are measurable.

(ESM4) Such a choice is possible because by definition of supremum, for any  $\delta > 0$ , there exists an element  $\tilde{x}_{i,t} \in X(t)$  of norm 1 such that

$$\sup_{\substack{x \in X(t) \\ \|x\|_{X(t)}=1}} |\langle x_{i,t}^*, x \rangle_{X^*(t), X(t)}| - |\langle x_{i,t}^*, \tilde{x}_{i,t} \rangle_{X^*(t), X(t)}| < \delta. \quad (2)$$

Then setting  $x_{i,t} = \tilde{x}_{i,t} \text{sign}(\langle x_{i,t}^*, \tilde{x}_{i,t} \rangle_{X^*(t), X(t)})$  and choosing  $\delta = \frac{\epsilon}{2\|h\|_{L^1(0,T)}}$  implies (2.5).

(ESM5) *Proof of Lemma 2.8.* For  $q < \infty$ , it is easy to check that  $\phi_t: L^q(\Omega_0) \rightarrow L^q(\Omega(t))$  is a linear homeomorphism satisfying the additional boundedness requirements. Therefore, let us discuss  $q = \infty$ . Let  $u \in L^\infty(\Omega(t))$ . We have

$$\|u\|_{L^\infty(\Omega(t))} = \text{ess sup}_{x \in \Omega(t)} |u(x)| = \text{ess sup}_{y \in \Omega_0} |u(\Phi_t^0(y))| = \|\tilde{u}\|_{L^\infty(\Omega_0)}$$

because  $\Phi_t^0$  is a diffeomorphism so null sets are mapped to null sets. Now an application of Lemma 2.3 yields the result. The above calculation also shows that the norm is preserved for  $q = \infty$ .  $\square$

(ESM6) *Proof of Lemma 2.9.* That the embedding is continuous is obvious. Let  $w_n$  be a bounded sequence in  $W(H^1, H^{-1})$ . Then  $\phi_{-(\cdot)} w_n$  is a bounded sequence in  $\mathcal{W}(H^1, H^{-1})$ , and by  $\mathcal{W}(H^1, H^{-1}) \xrightarrow{c} L^2(0, T; L^2(\Omega_0))$ , there is a subsequence  $\phi_{-(\cdot)} w_{n_k} \rightarrow \tilde{w}$  that converges in  $L^2(0, T; L^2(\Omega_0))$ . Hence  $w_{n_k} \rightarrow \phi_{(\cdot)} \tilde{w}$  in  $L^2_{L^2}$ .  $\square$

(ESM7) *Proof of Theorem 2.10.* First we prove the following.

**1 Lemma.** *Let  $\{w_n\}$  and  $w$  be functions such that  $\{\tilde{w}_n\}$  and  $\tilde{w}$  are measurable (eg. membership of  $L^1_{L^1}$  will suffice). If for almost all  $t \in [0, T]$ ,*

$$\begin{aligned} w_n(t, x) &\rightarrow w(t, x) && \text{for almost all } x \in \Omega(t) \\ |w_n(t, x)| &\leq C && \text{for almost all } x \in \Omega(t) \text{ for all } n, \end{aligned}$$

then for almost all  $t \in [0, T]$ ,  $|w(t, x)| \leq C$  a.e. in  $\Omega(t)$ .

*Proof.* The first statement implies that there exist null sets  $N$  and  $M_t$  such that for all  $t \in [0, T] \setminus N$ ,  $|w_n(t, x)| \rightarrow |w(t, x)|$  for all  $x \in \Omega(t) \setminus M_t$ . The second statement is that for all  $t \in [0, T] \setminus S_n$ ,  $|w_n(t, x)| \leq C$  for all  $x \in \Omega(t) \setminus R_{n,t}$  where again  $S_n$  and  $R_{n,t}$  are null sets. Combining these, we find that for all  $t \in [0, T] \setminus (N \cup \bigcup S_n)$ ,  $|w(t, x)| \leq C$  for all  $x \in \Omega(t) \setminus (M_t \cup \bigcup R_{n,t})$ . We conclude after recalling that the countable union of null sets is null.  $\square$

In this proof,  $N, \hat{N}, M_t$  and  $\hat{M}_t$  are null sets.

Define  $v_n = w_n - w$ . Then the first premise means that for all  $t \in [0, T] \setminus N$ , for all  $\epsilon > 0$ , there exists  $K$  such that if  $n \geq K$ ,  $|v_n(t, x)| \leq \epsilon$  for all  $x \in \Omega(t) \setminus M_t$ ; if we set  $y = \Phi_0^t(x)$ , this is  $|\tilde{v}_n(t, y)| \leq \epsilon$  for all  $y \in \Omega_0 \setminus \Phi_0^t(M_t)$ . In other words,

$$\tilde{v}_n(t, y) \rightarrow 0 \quad \text{for all } y \in \Omega_0 \setminus \Phi_0^t(M_t). \quad (3)$$

The second premise is for  $t \in [0, T] \setminus \hat{N}$ ,  $|v_n(t, x)| \leq |w(t, x)| + |g(t, x)| \leq 2|g(t, x)|$  for all  $x \in \Omega(t) \setminus \hat{M}_t$  (where we used Lemma 1 and chose  $\hat{N}$  and  $\hat{M}_t$  to take into account the null sets of the lemma), i.e.,  $|\tilde{v}_n(t, y)| \leq 2|\tilde{g}(t, y)|$  for all  $y \in \Omega_0 \setminus \hat{\Phi}_0^t(\hat{M}_t)$ , which implies

$$|\tilde{v}_n(t, y)|^q \leq 2^q |\tilde{g}(t, y)|^q \quad \text{for all } y \in \Omega_0 \setminus \hat{\Phi}_0^t(\hat{M}_t). \quad (4)$$

Thus from (3) and (4), by the dominated convergence theorem, we have

$$\left( \int_{\Omega_0} |\tilde{v}_n(t)|^q \right)^{\frac{1}{q}} \rightarrow 0 \quad \text{for } t \in [0, T] \setminus (N \cup \hat{N}).$$

This is precisely the statement that for all  $t \in [0, T] \setminus (N \cup \hat{N})$ ,  $\|\tilde{v}_n(t)\|_{L^q(\Omega_0)} \rightarrow 0$ . We know  $\|\tilde{v}_n(t)\|_{L^q(\Omega_0)} \leq 2\|\tilde{g}(t)\|_{L^q(\Omega_0)}$  and the right hand side is in  $L^p(0, T)$  by assumption. So again we use the dominated convergence theorem which tells us that

$$\int_0^T \|\tilde{v}_n(t)\|_{L^q(\Omega_0)}^p \rightarrow 0,$$

i.e.,  $\tilde{v}_n = \tilde{w}_n - \tilde{w} \rightarrow 0$  in  $L^p(0, T; L^q(\Omega_0))$  or  $\tilde{w}_n \rightarrow \tilde{w}$  in  $L^p(0, T; L^q(\Omega_0))$ .  $\square$

(ESM8) We have

$$\begin{aligned} \int_0^T \langle \dot{u}_n(t), u_n^+(t) \rangle_{H^{-1}(\Omega(t)), H^1(\Omega(t))} &= \int_0^T \int_{\Omega(t)} \partial^\bullet u_n^+(t) u_n^+(t) \\ &= \int_0^T \frac{1}{2} \frac{d}{dt} \int_{\Omega(t)} u_n^+(t)^2 - \frac{1}{2} \int_0^T \int_{\Omega(t)} u_n^+(t)^2 \nabla_\Omega \cdot \mathbf{w} \\ &= \frac{1}{2} \int_{\Omega(T)} u_n^+(T)^2 - \frac{1}{2} \int_{\Omega_0} u_n^+(0)^2 - \frac{1}{2} \int_0^T \int_{\Omega(t)} u_n^+(t)^2 \nabla_\Omega \cdot \mathbf{w}. \end{aligned}$$

(ESM9) To see this, let us show that if  $w_n(x) \rightarrow w(x)$  pointwise a.e. in  $\Omega$ , then  $g(w_n(x)) \rightarrow g(w(x))$  pointwise a.e. in  $\Omega$ . Fix  $x$  such that  $w(x) > 0$ . Then for every  $\epsilon$ , there exists an  $N_\epsilon$  such that if  $n \geq N_\epsilon$ , we have  $|w_n(x) - w(x)| \leq \epsilon$ . In other words,  $w(x) - \epsilon \leq w_n(x) \leq w(x) + \epsilon$ . So if we pick  $\epsilon = \epsilon'$  small enough, we find  $w_n(x) \geq w(x) - \epsilon' \geq 0$ . Therefore it follows that  $g(w_n) = 1$  for  $n \geq N_{\epsilon'}$ . This shows that when  $x$  is s.t  $w(x) > 0$ ,  $g(w_n) \rightarrow g(w) = 1$  pointwise. When  $x$  is such that  $g(x) < 0$ , a similar argument shows again that we get convergence. When  $x$  is such that  $w(x) = 0$ , we cannot control the sign of  $w_n(x)$  but  $\nabla w = 0$  on the set  $w = 0$ .

(ESM10) *Proof of Lemma 3.5.* Testing with  $\mathcal{E}_\epsilon(u_\epsilon)$  gives

$$\begin{aligned} \langle \partial^\bullet(\mathcal{E}_\epsilon(u_\epsilon(t))), \mathcal{E}_\epsilon(u_\epsilon(t)) \rangle_{V^*(t), V(t)} + \int_{\Omega(t)} \nabla_\Omega u_\epsilon(t) \nabla_\Omega(\mathcal{E}_\epsilon(u_\epsilon(t))) + \int_{\Omega(t)} (\mathcal{E}_\epsilon(u_\epsilon(t)))^2 \nabla_\Omega \cdot \mathbf{w} \\ = \int_{\Omega(t)} f(t) \mathcal{E}_\epsilon(u_\epsilon(t)) \end{aligned}$$

which, since  $\nabla_\Omega u_\epsilon \nabla_\Omega(\mathcal{E}_\epsilon(u_\epsilon)) = (\mathcal{E}_\epsilon)'(u_\epsilon) |\nabla_\Omega u_\epsilon|^2 \geq |\nabla_\Omega u_\epsilon|^2$  gives us

$$\frac{1}{2} \frac{d}{dt} \|\mathcal{E}_\epsilon(u_\epsilon(t))\|_{L^2(\Omega(t))}^2 + \int_{\Omega(t)} |\nabla_\Omega u_\epsilon(t)|^2 + \frac{1}{2} \int_{\Omega(t)} (\mathcal{E}_\epsilon(u_\epsilon(t)))^2 \nabla_\Omega \cdot \mathbf{w} \leq \int_{\Omega(t)} f(t) \mathcal{E}_\epsilon(u_\epsilon(t)).$$

Integrating over time and using the previous estimate, we find

$$\frac{1}{2} \|\mathcal{E}_\epsilon(u_\epsilon(T))\|_{L^2(\Omega(T))}^2 + \int_0^T \int_{\Omega(t)} |\nabla_\Omega u_\epsilon(t)|^2 \leq \frac{1}{2} (1 + M)^2 |\Omega_0| + C_1(T, M, \mathbf{w}, f).$$

For the time derivative:

$$\begin{aligned} \|\partial^\bullet(\mathcal{E}_\epsilon u_\epsilon)\|_{L^2_{H^{-1}}} &\leq \sup_{\substack{v \in L^2_{H^1}, \\ \|v\|=1}} \int_0^T \int_{\Omega(t)} |\nabla_\Omega u_\epsilon(t) \nabla_\Omega v(t) + \mathcal{E}_\epsilon(u_\epsilon(t)) v(t) \nabla_\Omega \cdot \mathbf{w}| + \int_0^T \int_{\Omega(t)} |f(t) v(t)| \\ &\leq C_2(T, \Omega, M, \mathbf{w}, f). \end{aligned}$$

$\square$

(ESM11) First, we need the following lemma.

**2 Lemma.** *The map*

$$\lambda \rightarrow \int_0^T \int_{\Omega(t)} x(t) \mathcal{U}(u(t) + \lambda v(t)) \quad \forall u, v, x \in L^2_{L^2}$$

*is continuous on  $[0, 1]$ .*

*Proof.* Consider for a.a  $t$

$$F_t(\lambda) = \int_{\Omega(t)} x(t, y) \mathcal{U}(u(t, y) + \lambda v(t, y)) \, dy.$$

The integrand is evidently continuous with respect to  $\lambda$ , and  $|x(t, y) \mathcal{U}(u(t, y) + \lambda v(t, y))| \leq (|u(t, y)| + |v(t, y)|) |w(t, y)|$  (because  $\lambda \leq 1$ ) and the right hand side is integrable over  $\Omega(t)$ . Thus  $F_t$  is continuous. Now consider

$$\lambda \mapsto \int_0^T F_t(\lambda) \, dt.$$

We just showed that the integrand  $\lambda \mapsto F_t(\lambda)$  is continuous, and  $|F_t(\lambda)| \leq \|u(t)\|_{L^2(\Omega(t))} \|w(t)\|_{L^2(\Omega(t))} + \|v(t)\|_{L^2(\Omega(t))} \|w(t)\|_{L^2(\Omega(t))}$ , and the right hand side is integrable. Therefore  $\int_0^T F_t(\lambda)$  is continuous in  $\lambda$ .  $\square$

Let us pick  $w = \chi - \lambda x$ , where  $\lambda \in [0, 1]$  and  $x \in L^2_{L^2}$ . Then this becomes

$$\int_0^T \int_{\Omega(t)} \lambda x(u - \mathcal{U}(\chi - \lambda x)) \geq 0.$$

Since  $\lambda$  is positive, we can divide through this expression by  $\lambda$ , and then we can send  $\lambda \rightarrow 0$  to receive by continuity (see Lemma 2)

$$\int_0^T \int_{\Omega(t)} x(u - \mathcal{U}(\chi)) \geq 0.$$

This then implies that  $u = \mathcal{U}(\chi)$ .

(ESM12) *Proof of Lemma 3.7.* To see this, for  $s \in (0, T]$ , consider the function  $\chi_{\epsilon, s}(t) = \min(1, \epsilon^{-1}(s - t)^+)$  which has a weak derivative

$$\chi'_{\epsilon, s}(t) = \begin{cases} 0 & : t \in (0, s - \epsilon) \\ -\frac{1}{\epsilon} & : t \in (s - \epsilon, s) \\ 0 & : t \in (s, T) \end{cases}.$$

Take the test function in (1.3) to be  $\chi_{\epsilon, T} \eta$  where  $\eta \in W(H^1, L^2)$ ,

$$\begin{aligned} - \int_0^T \int_{\Omega(t)} (\dot{\chi}_{\epsilon, T}(t) \eta(t) + \chi_{\epsilon, T}(t) \dot{\eta}(t)) e(t) + \int_0^T \int_{\Omega(t)} \chi_{\epsilon, T}(t) \nabla_{\Omega} u \nabla_{\Omega} \eta(t) &= \int_0^T \int_{\Omega(t)} \chi_{\epsilon, T}(t) f(t) \eta(t) \\ &+ \int_{\Omega_0} \chi_{\epsilon, T}(0) e_0 \eta(0) \end{aligned}$$

and this becomes

$$\begin{aligned} \frac{1}{\epsilon} \int_{T-\epsilon}^T \int_{\Omega(t)} \eta(t) e(t) - \int_0^T \int_{\Omega(t)} \chi_{\epsilon, T}(t) \dot{\eta}(t) e(t) &= \int_0^T \int_{\Omega(t)} \chi_{\epsilon, T}(t) (f(t) \eta(t) - \nabla_{\Omega} u(t) \nabla_{\Omega} \eta(t)) \\ &+ \int_{\Omega_0} \chi_{\epsilon, T}(0) e_0 \eta(0). \end{aligned}$$

Send  $\epsilon \rightarrow 0$  and use the Lebesgue differentiation theorem on the left hand side to yield

$$\int_{\Omega(T)} \eta(T) e(T) - \int_0^T \int_{\Omega(t)} \dot{\eta}(t) e(t) = \int_0^T \int_{\Omega(t)} \left( -\nabla_{\Omega} u(t) \nabla_{\Omega} \eta(t) + \int_{\Omega(t)} f(t) \eta(t) \right) + \int_{\Omega_0} e_0 \eta(0).$$

$\square$

(ESM13) The regularisations  $a_{\epsilon}$  exist for the following reason. Define  $\tilde{a} = a \circ \Phi_t^0$ , and note that  $0 \leq \tilde{a} \leq 1$  and  $\tilde{a} \in L^2((0, T) \times \Omega_0)$  (it is measurable since it is piecewise measurable). By density of  $C^2([0, T] \times \Omega_0) \subset L^2((0, T) \times \Omega_0)$ , there exist  $\tilde{a}_{\epsilon} \in C^2([0, T] \times \Omega_0)$  that satisfy  $0 \leq \tilde{a}_{\epsilon} \leq 1$  a.e. and  $\|\tilde{a}_{\epsilon} - \tilde{a}\|_{L^2((0, T) \times \Omega_0)} \leq C_H \epsilon$ . But

$$C_H \|a_{\epsilon} - a\|_{L^2_{L^2}} \leq \|\tilde{a}_{\epsilon} - \tilde{a}\|_{L^2(0, T; L^2(\Omega_0))} = \|\tilde{a}_{\epsilon} - \tilde{a}\|_{L^2((0, T) \times \Omega_0)} \leq C_H \epsilon,$$

where  $a_{\epsilon} := \tilde{a}_{\epsilon}$ .

(ESM14) By changing variables  $s = t - \tau$ , we rewrite (3.9) as

$$\begin{aligned}\partial_\tau^\bullet \eta_\epsilon(t-s) + (a_\epsilon(x, t-s) + \epsilon) \Delta_\Omega \eta_\epsilon(t-s) &= 0 \\ \eta_\epsilon(t) &= \xi.\end{aligned}$$

Noticing  $\partial_\tau^\bullet \eta_\epsilon(t-s) = -\partial_s^\bullet \eta_\epsilon(t-s)$  and substituting  $\varphi_\epsilon(s) = \eta_\epsilon(t-s)$ , this can be written as

$$\begin{aligned}\dot{\varphi}_\epsilon(s) - (a_\epsilon(x, t-s) + \epsilon) \Delta_\Omega \varphi_\epsilon(s) &= 0 \\ \varphi_\epsilon(0) &= \xi\end{aligned}$$

which holds for  $s \in (0, t)$ . This is precisely in the form of the PDE in Lemma 2.13.

(ESM15) We can write

$$\begin{aligned}& \int_{\Omega(t)} (e_1(t) - e_2(t)) \eta(t) \\ & - \int_0^t \int_{\Omega(\tau)} (e_1(\tau) - e_2(\tau)) (\dot{\eta}(\tau) + (a_\epsilon(x, \tau) + \epsilon) \Delta_\Omega \eta(\tau) - (a_\epsilon(x, \tau) - a(x, \tau) + \epsilon) \Delta_\Omega \eta(\tau)) \\ & = \int_0^t \int_{\Omega(\tau)} (f_1(\tau) - f_2(\tau)) \eta(\tau) + \int_{\Omega_0} (e_0^1 - e_0^2) \eta(0).\end{aligned}$$

(ESM16) We can estimate as follows:

$$\begin{aligned}\int_0^t \int_{\Omega(\tau)} |a(x, \tau) - a_\epsilon(x, \tau)| |\Delta_\Omega \eta_\epsilon(\tau)| &\leq \left( \int_0^t \int_{\Omega(\tau)} \frac{|a(x, \tau) - a_\epsilon(x, \tau)|^2}{\epsilon} \right)^{\frac{1}{2}} \left( \int_0^t \int_{\Omega(\tau)} \epsilon |\Delta_\Omega \eta_\epsilon(\tau)|^2 \right)^{\frac{1}{2}} \\ &\leq \sqrt{\epsilon} \|a - a_\epsilon\|_{L^2_{L^2}} \sqrt{(2 + \epsilon)(1 + e^{2C_w(2+\epsilon)t})} \left( \int_{\Omega_0} |\nabla_\Omega \xi|^2 \right)^{\frac{1}{2}} \rightarrow 0\end{aligned}$$

and

$$\begin{aligned}\int_0^t \int_{\Omega(\tau)} |\epsilon \Delta_\Omega \eta_\epsilon| &\leq \left( \int_0^t \int_{\Omega(\tau)} \epsilon \right)^{\frac{1}{2}} \left( \int_0^t \int_{\Omega(\tau)} \epsilon (\Delta_\Omega \eta_\epsilon)^2 \right)^{\frac{1}{2}} \\ &\leq \sqrt{t|\Omega|\epsilon(2 + \epsilon)(1 + e^{2C_w(2+\epsilon)t})} \left( \int_{\Omega_0} |\nabla_\Omega \xi|^2 \right)^{\frac{1}{2}} \rightarrow 0.\end{aligned}$$

## References

- [1] Alphonse A, Elliott CM, Stinner B. 2014. An abstract framework for parabolic PDEs on evolving spaces. *Port. Math.* 2015.
- [2] L. Gasinski and N.S. Papageorgiou, *Nonlinear analysis*. Series in Mathematical Analysis and Applications, 9. Chapman & Hall/CRC, Boca Raton, FL, 2006.
